# Supplementary material for: Oral arginine supplementation protects female mice from the onset of non-alcoholic steatohepatitis
Source: PubMed Central journal article supplement (PMC5487836; doi:10.1007/s00726-017-2423-4), 2017-04-22
Supplement: 726_2017_2423_MOESM1_ESM.pdf [file 726_2017_2423_MOESM1_ESM.pdf]

Oral arginine supplementation protects female mice from the onset of non-alcoholic steatohepatitis, Amino Acids, Sellmann C, Degen C, Jin CJ, Nier A, Engstler AJ, Hasan Alkhatib D, De Bandt JP, Bergheim I. E-Mail: [ina.bergheim@univie.ac.at](mailto:ina.bergheim@univie.ac.at), University of Vienna

**Online Resource Table 1. Nutrient composition of control or Western-style diet fed female mice for 6 weeks (dry diet).**

|                                           |         | Control diet | Western-style diet |
|-------------------------------------------|---------|--------------|--------------------|
| Crude protein, CP                         | % wt/wt | 17.4         | 16.0               |
| Crude fat, CL                             | % wt/wt | 5.1          | 11.8               |
| Crude fibre, CF                           | % wt/wt | 5.0          | 2.0                |
| Crude ash                                 | % wt/wt | 4.1          | 4.2                |
| Starch                                    | % wt/wt | 34.6         | 5.0                |
| Sucrose                                   | % wt/wt | 11.0         | -                  |
| Glucose                                   | % wt/wt | -            | 5.0                |
| Fructose                                  | % wt/wt | -            | 50.0               |
| Cholesterol                               | % wt/wt | -            | 0.16               |
| L-Lysine                                  | % wt/wt | 1.43         | 1.32               |
| L-Methionine + L-Cysteine                 | % wt/wt | 1.00         | 0.96               |
| L-Threonine                               | % wt/wt | 0.75         | 0.69               |
| Calcium                                   | % wt/wt | 0.78         | 0.77               |
| Phosphorus                                | % wt/wt | 0.48         | 0.47               |
| Sodium                                    | % wt/wt | 0.23         | 0.30               |
| Vitamin A (retinol acetate)               | IU/kg   | 15000        | 15000              |
| Vitamin D <sub>3</sub> (cholecalciferol)  | IU/kg   | 1500         | 1500               |
| Vitamin E ( $\alpha$ -tocopherol acetate) | mg/kg   | 150          | 150                |
| Fatty acids                               |         |              |                    |
| 4:0                                       | % wt/wt | -            | 0.44               |
| 6:0                                       | % wt/wt | -            | 0.29               |
| 8:0                                       | % wt/wt | -            | 0.16               |
| 10:0                                      | % wt/wt | -            | 0.35               |
| 12:0                                      | % wt/wt | -            | 0.40               |
| 14:0                                      | % wt/wt | 0.02         | 1.23               |
| 16:0                                      | % wt/wt | 0.57         | 3.10               |
| 18:0                                      | % wt/wt | 0.18         | 1.14               |
| 18:1 (n-9)                                | % wt/wt | 1.28         | 2.58               |
| 18:2 (n-6)                                | % wt/wt | 2.65         | 0.21               |
| 18:3 (n-3)                                | % wt/wt | 0.29         | 0.06               |
| Metabolizable energy (ME)                 | MJ/kg   | 15.7         | 17.8               |
| CP                                        | kJ%     | 19           | 15                 |
| CL                                        | kJ%     | 12           | 25                 |
| Carbohydrate, CHO                         | kJ%     | 69           | 60                 |
