# Supplementary material for: Oral arginine supplementation protects female mice from the onset of non-alcoholic steatohepatitis
Source: PubMed Central journal article supplement (PMC5487836; doi:10.1007/s00726-017-2423-4), 2017-04-22
Supplement: 726_2017_2423_MOESM2_ESM.pdf [file 726_2017_2423_MOESM2_ESM.pdf]

Oral arginine supplementation protects female mice from the onset of non-alcoholic steatohepatitis, Amino Acids, Sellmann C, Degen C, Jin CJ, Nier A, Engstler AJ, Hasan Alkhatib D, De Bandt JP, Bergheim I. E-Mail: [ina.bergheim@univie.ac.at](mailto:ina.bergheim@univie.ac.at), University of Vienna

**Online Resource Table 2. Primer sequences used for real-time RT-PCR to determine expression of genes in liver tissue in female mice fed a C diet or WSD with or without Arg supplementation for 6 weeks.<sup>1</sup>**

| Gene name       | Forward (5' – 3')            | Reverse (5' – 3')              |
|-----------------|------------------------------|--------------------------------|
| <i>18S</i>      | gta acc cgt tga acc cca tt   | cca tcc aat cgg tag tag cg     |
| <i>Acc</i>      | ctt cct cct gat gag caa ctct | cgt gag ttt tcc caa aat aag c  |
| <i>Bax</i>      | tgc aga gga tga ttg ctg ac   | gat cag ctc ggg cac ttt ag     |
| <i>Bcl-xl</i>   | atg gca gca gtg aag caa g    | gca atc cga ctc acc aat acc    |
| <i>Cpt-1</i>    | gtg ttg gag gtg aca gac tt   | cac ttt ctc ttt cca caa gg     |
| <i>Fasn</i>     | tct ggg cca acc tca ttg gt   | gaa gct ggg ggt cca ttg tg     |
| <i>Ir</i>       | cat ccc gaa agc gaa gat cc   | gag tcc tga ttg cat gcc tgc ag |
| <i>Irs-1</i>    | gct cta gtg ctt ccg tgt cc   | gtt gcc acc cct aga caa aa     |
| <i>Scd-1</i>    | ccg ata aaa ggg ggc tga gg   | tgc tga gat cga gcg tgg ac     |
| <i>Srebp-1c</i> | acc ggc tac tgc tgg act gc   | aga gca aga ggg tgc cat cg     |
| <i>Tlr-4</i>    | agc cat tgc tgc caa cat ca   | gct gcc tca gca gga ctt c      |

<sup>1</sup>*18S* = 18S ribosomal RNA, *Acc* = acetyl-CoA carboxylase, *Bax*, BCL2-associated X protein; *Bcl-xl*, B-cell lymphoma extra-large; *Cpt-1* = carnitine palmitoyltransferase 1, *Fasn* = fatty acid synthase, *Ir* = insulin receptor, *Irs-1* = insulin receptor substrate 1, *Scd-1* = stearyl-CoA desaturase, *Srebp-1c* = sterol regulatory element-binding protein 1c, *Tlr-4* = toll-like receptor 4.
