# Supplementary material for: Oral arginine supplementation protects female mice from the onset of non-alcoholic steatohepatitis
Source: PubMed Central journal article supplement (PMC5487836; doi:10.1007/s00726-017-2423-4), 2017-04-22
Supplement: 726_2017_2423_MOESM3_ESM.pdf [file 726_2017_2423_MOESM3_ESM.pdf]

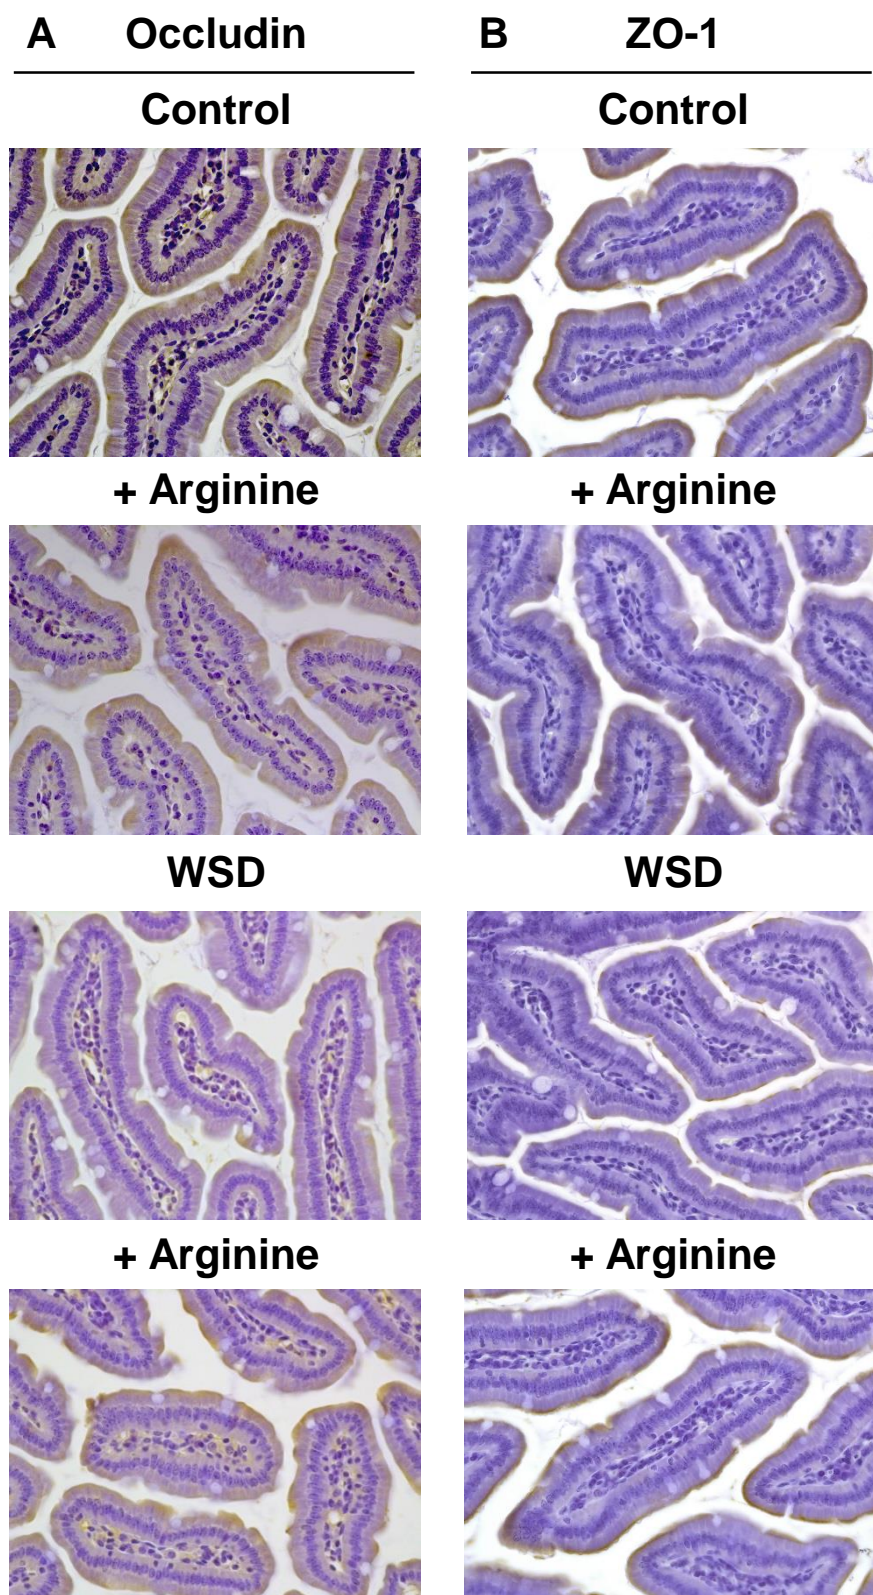

**Supplemental Figure 1. Staining for tight junction proteins in the small intestine of female mice fed a C diet or WSD with or without Arg supplementation for 6 weeks. Representative photomicrographs of (A) occludin and (B) ZO-1 staining in upper parts of the small intestine (400x).**
